# Supplementary material for: Utilization of the Rat Tibial Nerve Transection Model to Evaluate Cellular and Molecular Mechanisms Underpinning Denervation-Mediated Muscle Injury
Source: MDPI journal article supplement (doi:10.3390/ijms25031847), 2024-02-03
Supplement: s1 [file s1]

# Supplemental Materials and Methods

## Utilization of the Rat Tibial Nerve Transection Model to evaluate cellular and molecular mechanisms underpinning denervation-mediated muscle injury.

Christina Doherty<sup>1</sup>, Monika Lodyga<sup>1</sup>, Judy Correa<sup>1</sup>, Caterina Di Ciano-Oliveira<sup>1</sup>, Pamela Plant<sup>1</sup>, James Bain<sup>2</sup>, Jane Batt<sup>1,3</sup>

- 1) Keenan Centre for Biomedical Research of Saint Michael's Hospital, Unity Health Toronto, Ontario, Canada
- 2) McMaster University Faculty of Health Science, Division of Plastic Surgery, Hamilton, Ontario, Canada
- 3) Department of Medicine, Temerty Faculty of Medicine, University of Toronto, Toronto, Ontario, Canada

## FAPs Cell Culture

### Media

#### 1) *FAPs Basal Growth Media*

- 90% Base Media:
  - 79% DMEM DMEM [Gibco, 11995-065]
  - 20% FBS FBS [Sigma, F1051]
  - 1% Penicillin-Streptomycin Millipore Sigma, P4333]
- 10% Heat-inactivated Horse Serum [Gibco, 26050-088]
- 2.5 ng/mL basic Fibroblast Growth Factor (bFGF) [Gibco, PHG0266]

#### 2) *FAPs Adipogenic Differentiation Media:*

- 78% DMEM
- 20% FBS
- 1% Penicillin/Streptomycin
- 1.25 µM Dexamethasone (stock concentration 5 mg/mL) stock solution Millipore Sigma, D4902]
- 0.5 mM IBMX (stock concentration 10 mg/mL) Millipore Sigma, I5879]
- 5 µM Troglitazone stock solution (stock concentration 1 mg/mL) [Millipore Sigma, T2573]
- 1 µg/mL Humulin R (stock concentration 1 mM) [Lilly, H10210]

## RT qPCR Primers

### Rat Primers

| Gene        | Forward Primer           | Reverse Primer              |
|-------------|--------------------------|-----------------------------|
| Perilipin-1 | GTGGCTCTCAGCTGCATGT      | TTCTGGAAGCACTCACAGGTCC      |
| GDNF        | GCGGTTCTGTGAAGCGGCCGA    | TAGATACATCCACACCGTTTAGCGG   |
| PCNA        | CGTCGCAACTCCGCCACCAT     | TCACGCCGCCCGAACTGATG        |
| SMA         | CCAGCCAGTCGCCATCAGGA     | GCCCGGAGCCATTGTCACAC        |
| Col1a1      | AAAACGGGAGGGCGAGTGCT     | CTCCCTTGGGTCCCTCGACT        |
| Ki67        | CTGCAGAGAAGGTTGGGATAAA   | CTGACTTTGCCCAGAGATGAA       |
| HPRT        | GCCGACCGGTTCTGTCAT       | TCATAACCTGGTTCATCATCACTAATC |
| HMBS        | GGCTCAGATAGCATGCAAGAGA   | TGGACCATCTTCTTGCTGAACA      |
| GAPDH       | GACCACAGTCCATGCCATCACTGC | GCTGTTGAAGTCGCAGGAGACAAC    |
